# Supplementary material for: An Unbiased Assessment of the Role of Imprinted Genes in an Intergenerational Model of Developmental Programming
Source: PLOS journal article supplement (doi:10.1371/journal.pgen.1002605), 2012-04-12

Figure S1

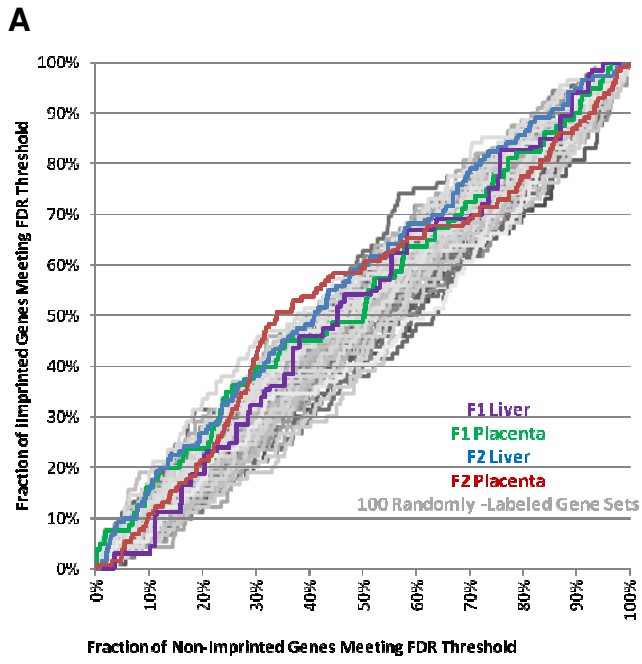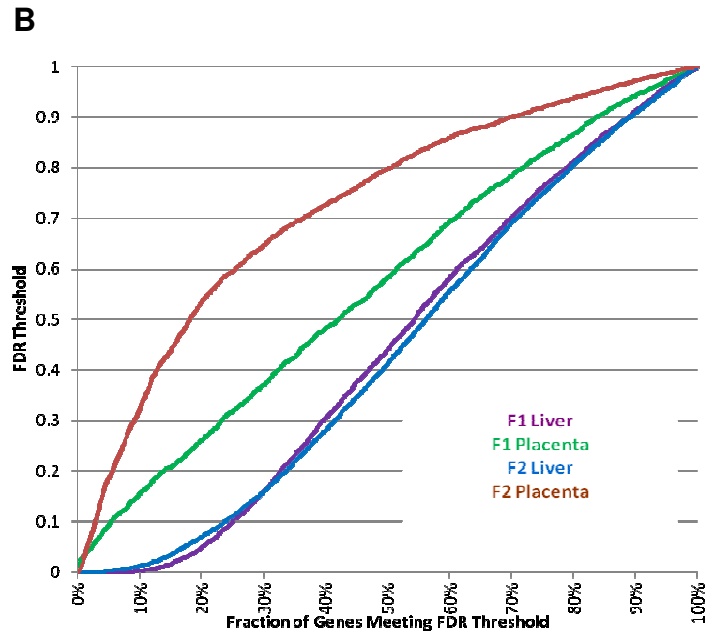

Supplement: S1 (10.1371/journal.pgen.1002605.s001) [file journal.pgen.1002605.s001]
